# Supplementary material
Source: PubMed Central journal article supplement (PMC3519162)
Supplement: supp_120233_low-van-1-at.pdf [file supp_120233_low-van-1-at.pdf]

[Type text]

Appendix 1 (as supplied by the author): Serum vitamin D levels in participants with and without disease condition

|                       | With disease |                    | Without disease |                    | P-Value |
|-----------------------|--------------|--------------------|-----------------|--------------------|---------|
|                       | N            | Mean (95% CI)      | N               | Mean (95% CI)      |         |
| Diabetes Mellitus     | 43           | 66.3 (60.2 – 72.9) | 1016            | 65.5 (64.2 – 66.8) | 0.82    |
| Hypertension          | 216          | 64.5 (61.8 – 67.4) | 843             | 65.8 (64.3 – 67.2) | 0.44    |
| Myocardial Infarction | 20           | 69.7 (60.6 – 80.1) | 1039            | 65.5 (64.3 – 66.8) | 0.39    |
| Stroke                | 22           | 69.5 (60.8 – 79.4) | 1037            | 65.5 (64.2 – 66.8) | 0.39    |
| Malignancies          | 68           | 63.7 (59.0 – 68.6) | 991             | 65.6 (64.3 – 67.0) | 0.44    |

Analyses adjusted for age, gender, body mass index, month blood was drawn and habitual vitamin D intake via food. Subjects using vitamin D supplements and/or multivitamin supplements were excluded. Results are presented as geometric means with 95 percent confidence interval.
