# Supplementary material
Source: PubMed Central journal article supplement (PMC3519162)
Supplement: supp_120233_low-van-2-at.pdf [file supp_120233_low-van-2-at.pdf]

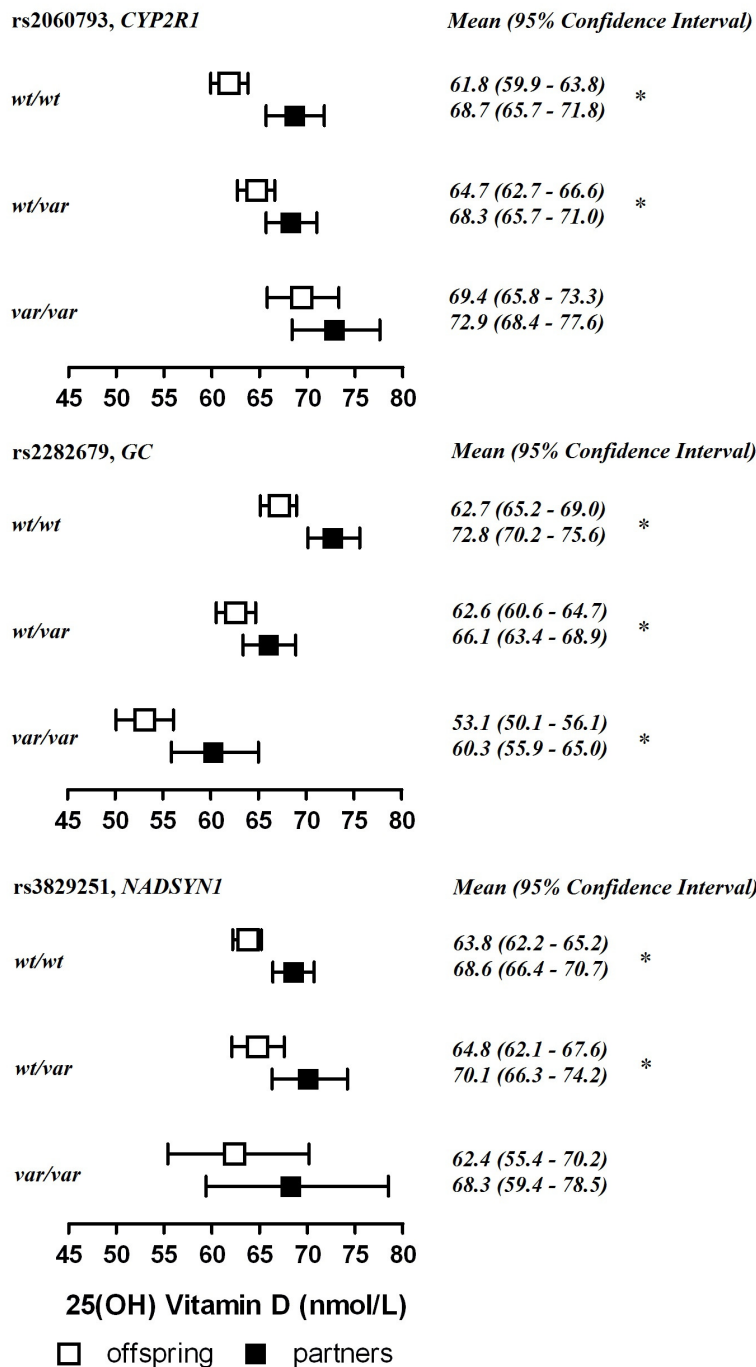

Appendix 2 (as supplied by the authors): Vitamin D levels in offspring and controls by genotype for common variants associated with vitamin D levels. Analyses were adjusted for age, sex, body mass index, month of the year the blood was drawn (except rs3829251, because the number of participants with the var/var genotype was too low), vitamin D use, multivitamin supplement use, and habitual vitamin D intake per day. The association between genotype and vitamin D levels for single nucleotide polymorphisms in rs2060793 and rs2282679 was statistically significant (both  $p < 0.001$ ). The association between rs3829251 genotype with vitamin D levels was not significant ( $p = 0.8$ ). Asterisks indicate statistically significant difference between offspring and control ( $p < 0.05$ ).
